# Supplementary material for: Effects of Roughage on the Lipid and Volatile-Organic-Compound Profiles of Donkey Milk
Source: MDPI journal article supplement (doi:10.3390/foods12112231), 2023-06-01
Supplement: s1 [file s1]

## Supplementary Figures

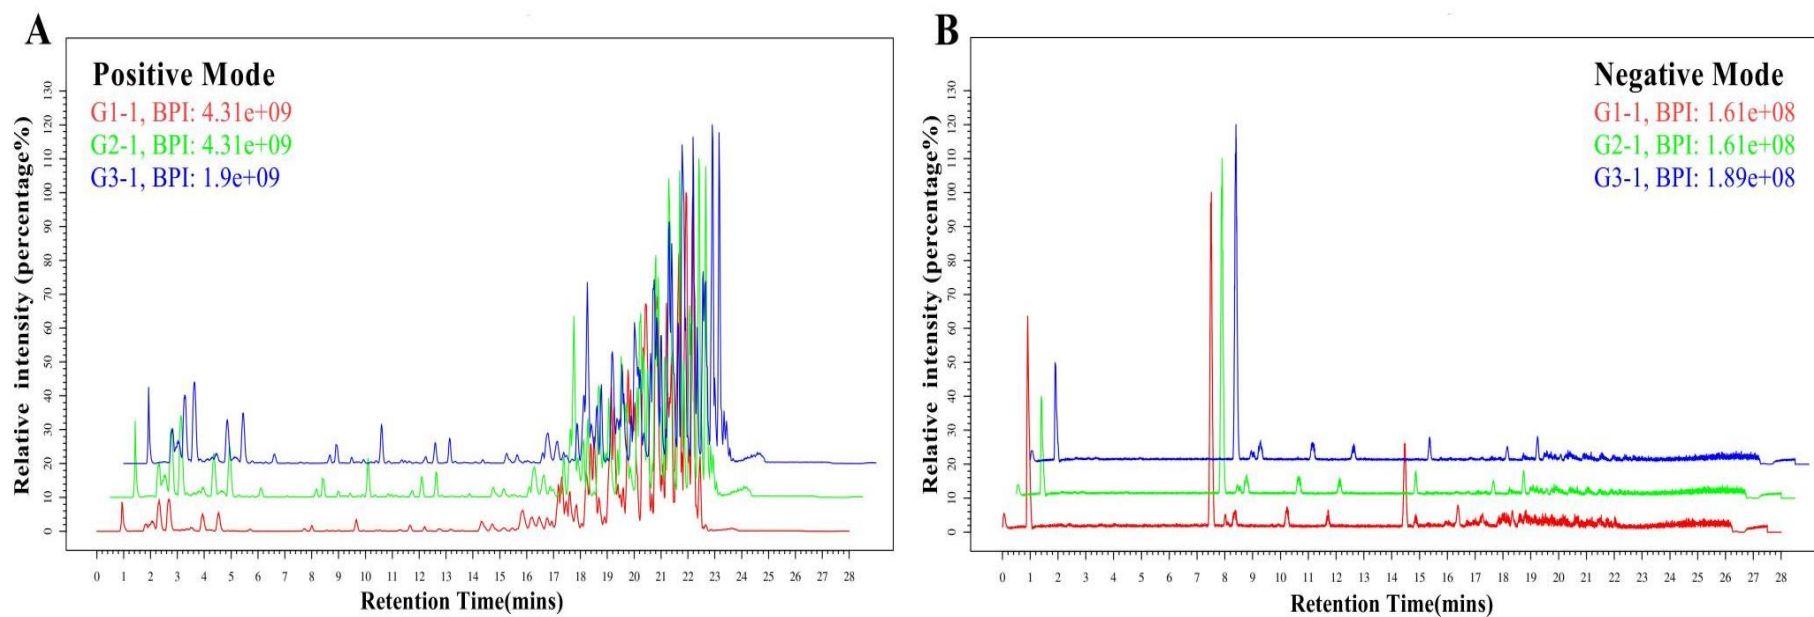

**Figure S1.** The positive (A) and negative mode (B) of lipid base peak chromatogram in donkey milk.

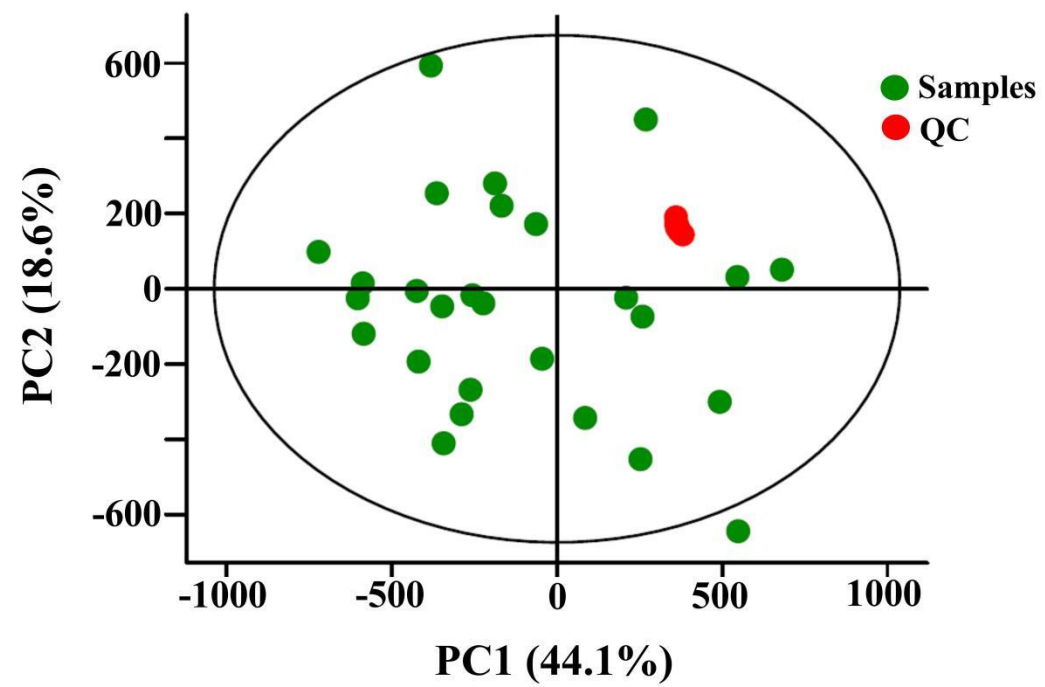

**Figure S2.** PCA score chart of donkey milk lipid quality control (QC).

## Supplementary Tables

**Table S1.** Differential lipids in donkey milk fed on different roughages.

| No. | Lipid               | Class   | Category | MainIon | mz       | Retention time (min) | VIP  | <i>p</i> -value |
|-----|---------------------|---------|----------|---------|----------|----------------------|------|-----------------|
| 1   | WE(2:0_19:4)        | WE      | FAs      | M+NH4   | 336.2897 | 7.876                | 2.06 | 0.0208          |
| 2   | Cer(d18:1_16:0)     | Cer     | SPs      | M+H     | 538.5194 | 17.305               | 1.24 | 0.0000          |
| 3   | Cer(d16:0_18:0)     | Cer     | SPs      | M+H     | 540.535  | 15.158               | 1.01 | 0.0022          |
| 4   | Cer(d36:0)          | Cer     | SPs      | M+H     | 568.5663 | 16.779               | 1.52 | 0.0022          |
| 5   | Cer(d38:0)          | Cer     | SPs      | M+H     | 596.5976 | 18.09                | 1.47 | 0.0035          |
| 6   | Cer(d37:0)          | Cer     | SPs      | M+H     | 582.582  | 17.552               | 2.12 | 0.0036          |
| 7   | Cer(d22:0_18:0)     | Cer     | SPs      | M+H     | 624.6289 | 19.094               | 1.08 | 0.0036          |
| 8   | SM(d40:0)           | SM      | SPs      | M+H     | 789.6844 | 19.281               | 1.83 | 0.0013          |
| 9   | SM(d40:1)           | SM      | SPs      | M+H     | 787.6688 | 19.002               | 1.29 | 0.0017          |
| 10  | SM(d41:0)           | SM      | SPs      | M+H     | 803.7001 | 19.604               | 1.14 | 0.0044          |
| 11  | SM(d42:0)           | SM      | SPs      | M+H     | 817.7157 | 19.909               | 1.43 | 0.0158          |
| 12  | BisMePA(20:2e_12:0) | BisMePA | GPs      | M+Na    | 681.483  | 17.228               | 1.72 | 0.0014          |
| 13  | BisMePA(30:1_16:0)  | BisMePA | GPs      | M+Na    | 893.697  | 21.637               | 1.15 | 0.0058          |
| 14  | BisMePA(30:0_16:0)  | BisMePA | GPs      | M+Na    | 895.7126 | 21.977               | 1.10 | 0.0089          |
| 15  | MePC(33:1)          | MePC    | GPs      | M+Na    | 782.567  | 15.057               | 1.09 | 0.0001          |
| 16  | MePC(35:1)          | MePC    | GPs      | M+Na    | 810.5983 | 17.19                | 2.07 | 0.0001          |

|    |                    |      |     |       |          |        |      |        |
|----|--------------------|------|-----|-------|----------|--------|------|--------|
| 17 | MePC(30:0)         | MePC | GPs | M+Na  | 742.5357 | 17.007 | 2.08 | 0.0002 |
| 18 | PC(33:3)           | PC   | GPs | M+H   | 742.5381 | 16.528 | 1.52 | 0.0007 |
| 19 | PC(44:0e)          | PC   | GPs | M+H   | 888.778  | 21.632 | 1.62 | 0.0045 |
| 20 | PE(18:1_18:2)      | PE   | GPs | M+H   | 742.5381 | 16.514 | 1.90 | 0.0004 |
| 21 | MG(18:2)           | MG   | GLs | M+H   | 355.2843 | 19.124 | 1.17 | 0.0171 |
| 22 | DG(24:1e)          | DG   | GLs | M+Na  | 463.3758 | 17.379 | 1.00 | 0.0011 |
| 23 | DG(24:0e)          | DG   | GLs | M+Na  | 465.3914 | 19.047 | 1.22 | 0.0018 |
| 24 | DG(26:3e)          | DG   | GLs | M+H   | 465.3938 | 18.948 | 1.21 | 0.0037 |
| 25 | DG(18:0_16:0)      | DG   | GLs | M+NH4 | 614.5718 | 19.547 | 1.89 | 0.0042 |
| 26 | DG(18:0_18:0)      | DG   | GLs | M+NH4 | 642.6031 | 20.141 | 1.37 | 0.0048 |
| 27 | DG(16:0_16:0)      | DG   | GLs | M+NH4 | 586.5405 | 18.839 | 1.10 | 0.0079 |
| 28 | TG(16:0_8:0_20:4)  | TG   | GLs | M+NH4 | 760.645  | 20.215 | 8.89 | 0.0000 |
| 29 | TG(8:0_14:2_18:1)  | TG   | GLs | M+NH4 | 706.598  | 19.702 | 3.20 | 0.0000 |
| 30 | TG(8:0_14:0_20:4)  | TG   | GLs | M+NH4 | 732.6137 | 19.741 | 3.21 | 0.0000 |
| 31 | TG(8:0_10:0_18:3)  | TG   | GLs | M+NH4 | 650.5354 | 18.015 | 4.76 | 0.0000 |
| 32 | TG(6:0_10:0_18:2)  | TG   | GLs | M+NH4 | 624.5198 | 16.062 | 2.49 | 0.0000 |
| 33 | TG(10:0_14:0_17:1) | TG   | GLs | M+NH4 | 724.645  | 20.797 | 1.12 | 0.0000 |
| 34 | TG(16:0_8:0_12:2)  | TG   | GLs | M+Na  | 657.5065 | 18.642 | 2.67 | 0.0000 |
| 35 | TG(8:0_10:1_18:3)  | TG   | GLs | M+NH4 | 648.5198 | 16.897 | 1.12 | 0.0000 |
| 36 | TG(8:0_10:0_14:1)  | TG   | GLs | M+Na  | 603.4595 | 17.322 | 1.02 | 0.0001 |
| 37 | TG(18:0_8:0_8:0)   | TG   | GLs | M+NH4 | 628.5511 | 17.646 | 1.21 | 0.0001 |
| 38 | TG(16:0_10:0_18:1) | TG   | GLs | M+NH4 | 766.6919 | 21.142 | 3.11 | 0.0001 |

|    |                    |    |     |       |          |        |       |        |
|----|--------------------|----|-----|-------|----------|--------|-------|--------|
| 39 | TG(4:0_16:0_18:3)  | TG | GLs | M+NH4 | 678.5667 | 18.899 | 3.06  | 0.0001 |
| 40 | TG(8:0_12:0_20:4)  | TG | GLs | M+NH4 | 704.5824 | 19.169 | 1.40  | 0.0001 |
| 41 | TG(16:0_8:0_16:1)  | TG | GLs | M+NH4 | 710.6293 | 20.521 | 11.33 | 0.0001 |
| 42 | TG(10:0_10:1_20:5) | TG | GLs | M+H   | 683.5245 | 18.649 | 1.14  | 0.0001 |
| 43 | TG(16:0_12:0_18:1) | TG | GLs | M+NH4 | 794.7232 | 21.512 | 2.90  | 0.0001 |
| 44 | TG(10:0_12:0_18:1) | TG | GLs | M+NH4 | 710.6293 | 20.226 | 2.85  | 0.0001 |
| 45 | TG(8:0_10:1_18:2)  | TG | GLs | M+NH4 | 650.5354 | 17.694 | 3.82  | 0.0002 |
| 46 | TG(4:0_12:0_18:3)  | TG | GLs | M+H   | 605.4776 | 18.353 | 1.97  | 0.0002 |
| 47 | TG(16:0_10:0_20:4) | TG | GLs | M+NH4 | 788.6763 | 20.705 | 8.19  | 0.0002 |
| 48 | TG(6:0_10:2_23:0)  | TG | GLs | M+NH4 | 694.598  | 19.037 | 1.22  | 0.0002 |
| 49 | TG(10:0_12:0_18:3) | TG | GLs | M+NH4 | 706.598  | 19.3   | 5.28  | 0.0002 |
| 50 | TG(8:0_10:3_14:1)  | TG | GLs | M+H   | 575.4306 | 16.133 | 1.11  | 0.0002 |
| 51 | TG(16:0_10:0_16:0) | TG | GLs | M+NH4 | 740.6763 | 21.144 | 5.61  | 0.0002 |
| 52 | TG(10:0_10:0_18:3) | TG | GLs | M+NH4 | 678.5667 | 17.673 | 2.61  | 0.0002 |
| 53 | TG(10:0_10:0_12:2) | TG | GLs | M+NH4 | 596.4885 | 14.989 | 1.51  | 0.0002 |
| 54 | TG(8:0_10:2_18:2)  | TG | GLs | M+H   | 631.4932 | 15.283 | 1.05  | 0.0002 |
| 55 | TG(45:7)           | TG | GLs | M+NH4 | 768.6137 | 20.168 | 2.15  | 0.0003 |
| 56 | TG(12:0_18:2_18:2) | TG | GLs | M+NH4 | 816.7076 | 21.136 | 6.2   | 0.0003 |
| 57 | TG(18:1_10:1_17:1) | TG | GLs | M+NH4 | 776.6763 | 20.873 | 2.29  | 0.0004 |
| 58 | TG(16:0_6:0_8:0)   | TG | GLs | M+NH4 | 572.4885 | 17.353 | 8.74  | 0.0004 |
| 59 | TG(16:0_17:1_18:2) | TG | GLs | M+H   | 843.7436 | 20.411 | 1.48  | 0.0004 |
| 60 | TG(18:1_12:0_18:1) | TG | GLs | M+NH4 | 820.7389 | 21.512 | 3.59  | 0.0004 |

|    |                    |    |     |       |          |        |      |        |
|----|--------------------|----|-----|-------|----------|--------|------|--------|
| 61 | TG(16:1_8:0_10:0)  | TG | GLs | M+NH4 | 626.5354 | 18.287 | 6.35 | 0.0005 |
| 62 | TG(8:0_8:0_20:5)   | TG | GLs | M+H   | 629.4776 | 17.285 | 1.07 | 0.0007 |
| 63 | TG(6:0_18:2_18:2)  | TG | GLs | M+NH4 | 732.6137 | 19.37  | 3.40 | 0.0007 |
| 64 | TG(18:4_8:0_18:1)  | TG | GLs | M+NH4 | 758.6293 | 19.815 | 1.77 | 0.0007 |
| 65 | TG(50:1)           | TG | GLs | M+NH4 | 850.7858 | 21.819 | 3.84 | 0.0008 |
| 66 | TG(18:1_18:3_20:5) | TG | GLs | M+H   | 901.728  | 21.269 | 1.04 | 0.0008 |
| 67 | TG(4:0_10:0_12:0)  | TG | GLs | M+Na  | 521.3813 | 14.499 | 1.01 | 0.0008 |
| 68 | TG(8:0_11:4_18:2)  | TG | GLs | M+Na  | 663.4595 | 17.11  | 9.28 | 0.0009 |
| 69 | TG(39:9)           | TG | GLs | M+H   | 663.4619 | 17.241 | 9.14 | 0.0009 |
| 70 | TG(10:0_10:0_18:1) | TG | GLs | M+NH4 | 682.598  | 19.69  | 4.34 | 0.0009 |
| 71 | TG(16:0_12:0_16:0) | TG | GLs | M+NH4 | 768.7076 | 21.517 | 4.05 | 0.0009 |
| 72 | TG(8:0_8:0_18:2)   | TG | GLs | M+Na  | 629.4752 | 17.449 | 1.27 | 0.0011 |
| 73 | TG(10:0_10:0_10:1) | TG | GLs | M+NH4 | 570.4728 | 14.955 | 1.84 | 0.0012 |
| 74 | TG(18:4_8:0_16:0)  | TG | GLs | M+NH4 | 732.6137 | 18.804 | 1.58 | 0.0014 |
| 75 | TG(16:0_18:3_18:3) | TG | GLs | M+NH4 | 868.7389 | 21.238 | 3.04 | 0.0014 |
| 76 | TG(8:0_10:0_18:1)  | TG | GLs | M+NH4 | 654.5667 | 19.036 | 5.94 | 0.0014 |
| 77 | TG(18:2_10:1_18:2) | TG | GLs | M+NH4 | 786.6606 | 20.303 | 2.89 | 0.0017 |
| 78 | TG(18:1_14:0_20:4) | TG | GLs | M+H   | 853.728  | 21.782 | 1.71 | 0.0017 |
| 79 | TG(8:0_10:0_18:2)  | TG | GLs | M+NH4 | 652.5511 | 18.385 | 6.06 | 0.0018 |
| 80 | TG(8:0_18:2_18:2)  | TG | GLs | M+NH4 | 760.645  | 19.912 | 4.63 | 0.0018 |
| 81 | TG(12:0_18:2_18:3) | TG | GLs | M+NH4 | 814.6919 | 20.494 | 2.51 | 0.0018 |
| 82 | TG(16:0_18:2_20:5) | TG | GLs | M+H   | 877.728  | 21.606 | 1.97 | 0.0021 |

|     |                    |    |     |       |          |        |      |        |
|-----|--------------------|----|-----|-------|----------|--------|------|--------|
| 83  | TG(18:1_12:0_18:3) | TG | GLs | M+NH4 | 816.7076 | 20.854 | 1.57 | 0.0021 |
| 84  | TG(8:0_17:1_18:2)  | TG | GLs | M+NH4 | 748.645  | 20.111 | 1.76 | 0.0023 |
| 85  | TG(16:1_8:0_18:2)  | TG | GLs | M+NH4 | 734.6293 | 19.882 | 5.86 | 0.0023 |
| 86  | TG(15:0_8:0_18:2)  | TG | GLs | M+NH4 | 722.6293 | 20.082 | 1.91 | 0.0023 |
| 87  | TG(15:0_8:0_18:3)  | TG | GLs | M+NH4 | 720.6137 | 19.578 | 1.02 | 0.0025 |
| 88  | TG(16:0_18:2_20:4) | TG | GLs | M+H   | 879.7436 | 21.888 | 2.09 | 0.0025 |
| 89  | TG(4:0_16:0_18:2)  | TG | GLs | M+Na  | 685.5378 | 19.432 | 2.49 | 0.0025 |
| 90  | TG(53:7)           | TG | GLs | M+NH4 | 880.7389 | 21.879 | 1.60 | 0.0027 |
| 91  | TG(18:1_18:3_18:3) | TG | GLs | M+NH4 | 894.7545 | 20.995 | 1.48 | 0.0027 |
| 92  | TG(20:0_18:3_18:3) | TG | GLs | M+NH4 | 924.8015 | 21.313 | 2.48 | 0.0031 |
| 93  | TG(10:0_18:1_18:1) | TG | GLs | M+NH4 | 792.7076 | 21.174 | 3.19 | 0.0031 |
| 94  | TG(8:0_8:0_18:1)   | TG | GLs | M+NH4 | 626.5354 | 17.296 | 1.22 | 0.0033 |
| 95  | TG(16:0_18:1_21:1) | TG | GLs | M+NH4 | 918.8484 | 22.239 | 1.15 | 0.0035 |
| 96  | TG(10:0_18:2_18:2) | TG | GLs | M+NH4 | 788.6763 | 20.393 | 3.44 | 0.0036 |
| 97  | TG(41:6e)          | TG | GLs | M+Na  | 705.5428 | 20.213 | 1.19 | 0.0037 |
| 98  | TG(12:0_10:1_18:3) | TG | GLs | M+NH4 | 704.5824 | 18.774 | 2.14 | 0.0038 |
| 99  | TG(18:0e_6:0_12:0) | TG | GLs | M+NH4 | 642.6031 | 19.53  | 1.72 | 0.0042 |
| 100 | TG(16:0_8:0_16:0)  | TG | GLs | M+NH4 | 712.645  | 20.712 | 4.60 | 0.0043 |
| 101 | TG(18:0_10:0_18:0) | TG | GLs | M+NH4 | 796.7389 | 21.494 | 2.80 | 0.0045 |
| 102 | TG(55:4)           | TG | GLs | M+NH4 | 914.8171 | 21.699 | 1.40 | 0.0051 |
| 103 | TG(55:8e)          | TG | GLs | M+Na  | 897.7306 | 22.088 | 1.06 | 0.0051 |
| 104 | TG(18:3_17:1_20:5) | TG | GLs | M+NH4 | 904.7389 | 21.618 | 1.03 | 0.0053 |

|     |                    |    |     |       |          |        |      |        |
|-----|--------------------|----|-----|-------|----------|--------|------|--------|
| 105 | TG(16:0_14:0_18:3) | TG | GLs | M+Na  | 823.6786 | 21.247 | 1.24 | 0.0055 |
| 106 | TG(10:0_12:0_22:0) | TG | GLs | M+NH4 | 768.7076 | 21.124 | 3.83 | 0.0058 |
| 107 | TG(18:1_18:2_20:2) | TG | GLs | M+NH4 | 926.8171 | 21.948 | 1.10 | 0.0064 |
| 108 | TG(8:0_12:0_12:0)  | TG | GLs | M+NH4 | 600.5198 | 16.986 | 4.58 | 0.0066 |
| 109 | TG(18:1_12:0_20:4) | TG | GLs | M+H   | 825.6967 | 21.541 | 1.28 | 0.0070 |
| 110 | TG(20:3_18:2_18:2) | TG | GLs | M+NH4 | 922.7858 | 21.038 | 1.49 | 0.0074 |
| 111 | TG(16:1_10:0_20:4) | TG | GLs | M+H   | 769.6341 | 20.748 | 2.11 | 0.0077 |
| 112 | TG(10:0_18:1_20:4) | TG | GLs | M+H   | 797.6654 | 21.175 | 1.78 | 0.0078 |
| 113 | TG(15:0_8:0_18:1)  | TG | GLs | M+NH4 | 724.645  | 20.511 | 2.26 | 0.0079 |
| 114 | TG(8:0_18:2_18:3)  | TG | GLs | M+NH4 | 758.6293 | 19.477 | 3.01 | 0.0080 |
| 115 | TG(8:0_17:1_18:1)  | TG | GLs | M+NH4 | 750.6606 | 20.557 | 2.56 | 0.0089 |
| 116 | TG(10:0_10:0_14:0) | TG | GLs | M+NH4 | 628.5511 | 18.057 | 5.78 | 0.0091 |
| 117 | TG(37:6e)          | TG | GLs | M+Na  | 649.4802 | 19.002 | 1.21 | 0.0107 |
| 118 | TG(18:0_10:0_12:0) | TG | GLs | M+NH4 | 712.645  | 20.214 | 4.49 | 0.0108 |
| 119 | TG(18:0_8:0_12:0)  | TG | GLs | M+NH4 | 684.6137 | 19.654 | 5.10 | 0.0112 |
| 120 | TG(14:0_14:0_14:0) | TG | GLs | M+NH4 | 740.6763 | 20.717 | 4.08 | 0.0112 |
| 121 | TG(16:1_11:4_16:1) | TG | GLs | M+NH4 | 742.598  | 20.29  | 1.40 | 0.0119 |
| 122 | TG(8:0_13:0_18:2)  | TG | GLs | M+NH4 | 694.598  | 19.509 | 1.23 | 0.0126 |
| 123 | TG(15:0_18:1_18:3) | TG | GLs | M+NH4 | 858.7545 | 21.423 | 1.09 | 0.0131 |
| 124 | TG(10:0_12:0_17:1) | TG | GLs | M+NH4 | 696.6137 | 19.995 | 1.64 | 0.0132 |
| 125 | TG(45:8e)          | TG | GLs | M+Na  | 757.5741 | 20.3   | 1.29 | 0.0133 |
| 126 | TG(18:2_18:2_20:4) | TG | GLs | M+H   | 903.7436 | 21.558 | 1.26 | 0.0136 |



|     |                    |    |     |       |          |        |      |        |
|-----|--------------------|----|-----|-------|----------|--------|------|--------|
| 127 | TG(12:0_12:0_20:4) | TG | GLs | M+H   | 743.6184 | 20.69  | 1.61 | 0.0141 |
| 128 | TG(18:1_14:1_20:4) | TG | GLs | M+H   | 851.7123 | 21.59  | 1.33 | 0.0144 |
| 129 | TG(16:1_13:0_18:2) | TG | GLs | M+NH4 | 804.7076 | 20.999 | 1.19 | 0.0158 |
| 130 | TG(47:7e)          | TG | GLs | M+Na  | 787.6211 | 21.109 | 1.04 | 0.0168 |
| 131 | TG(10:0_10:1_17:1) | TG | GLs | M+NH4 | 666.5667 | 18.825 | 1.02 | 0.0171 |
| 132 | TG(12:0_12:0_20:5) | TG | GLs | M+H   | 741.6028 | 20.292 | 1.96 | 0.0171 |
| 133 | TG(47:8e)          | TG | GLs | M+Na  | 785.6054 | 20.775 | 1.31 | 0.0172 |
| 134 | TG(8:0_8:0_20:2)   | TG | GLs | M+NH4 | 652.5511 | 17.389 | 2.24 | 0.0173 |
| 135 | TG(18:1_18:1_18:3) | TG | GLs | M+NH4 | 898.7858 | 21.273 | 2.09 | 0.0188 |
| 136 | TG(16:0_18:1_19:0) | TG | GLs | M+NH4 | 892.8328 | 22.252 | 1.10 | 0.0194 |
| 137 | TG(10:0_12:0_20:5) | TG | GLs | M+H   | 713.5715 | 19.724 | 1.01 | 0.0210 |
| 138 | TG(16:1_18:1_18:1) | TG | GLs | M+NH4 | 874.7858 | 21.873 | 7.09 | 0.0233 |
| 139 | TG(16:0_16:1_18:1) | TG | GLs | M+NH4 | 848.7702 | 21.834 | 4.89 | 0.0242 |
| 140 | TG(16:0e_6:0_16:0) | TG | GLs | M+NH4 | 670.6344 | 20.119 | 1.29 | 0.0251 |
| 141 | TG(14:0_18:2_18:3) | TG | GLs | M+NH4 | 842.7232 | 20.923 | 2.04 | 0.0290 |
| 142 | TG(16:1_10:0_18:1) | TG | GLs | M+NH4 | 764.6763 | 20.783 | 3.13 | 0.0336 |
| 143 | TG(10:0_12:0_23:0) | TG | GLs | M+NH4 | 782.7232 | 21.294 | 1.17 | 0.0344 |
| 144 | TG(10:0_12:0_18:2) | TG | GLs | M+NH4 | 708.6137 | 19.767 | 4.37 | 0.0356 |
| 145 | TG(47:1)           | TG | GLs | M+NH4 | 808.7389 | 21.355 | 1.02 | 0.0368 |
| 146 | TG(26:1_8:0_10:0)  | TG | GLs | M+NH4 | 766.6919 | 20.783 | 4.03 | 0.0382 |
| 147 | TG(8:0_18:1_18:1)  | TG | GLs | M+NH4 | 764.6763 | 20.323 | 3.6  | 0.0390 |
| 148 | TG(10:0_18:1_20:2) | TG | GLs | M+NH4 | 818.7232 | 20.829 | 2.61 | 0.0409 |

|     |                    |    |     |       |          |        |      |        |
|-----|--------------------|----|-----|-------|----------|--------|------|--------|
| 149 | TG(16:0_6:0_16:0)  | TG | GLs | M+NH4 | 684.6137 | 20.199 | 3.21 | 0.0412 |
| 150 | TG(10:0_18:1_20:3) | TG | GLs | M+NH4 | 816.7076 | 20.462 | 2.51 | 0.0412 |
| 151 | TG(18:0_8:0_15:0)  | TG | GLs | M+NH4 | 726.6606 | 20.522 | 1.17 | 0.0413 |
| 152 | TG(17:0_10:0_18:2) | TG | GLs | M+NH4 | 778.6919 | 20.952 | 1.82 | 0.0443 |
| 153 | TG(47:2)           | TG | GLs | M+NH4 | 806.7232 | 21.001 | 1.30 | 0.0492 |

Abbreviations: m/z, mass-to-charge ratio; VIP, variable importance in projection; TG, triglyceride; DG, diglyceride; MG, monoglyceride; MePC, methyl phosphatidylcholine; PC, phosphatidylcholine; PE, phosphatidylethanolamine; Cer, ceramide; SM, sphingomyelin; WE, wax ester; BisMePA, bis-methyl phosphatidic acid; FAs, fat acids; GLs, glycerolipids; GPs, glycerophospholipids; SPs, sphingolipids.

**Table S2.** Formation of volatile organic compounds in donkey milk for different roughage.

| No. | Compounds ( $\times 10^5$ )                      | RI      | NIST_RI | CAS          | Match Factor | G1                             | G2                             | G3                              | <i>p</i> value |
|-----|--------------------------------------------------|---------|---------|--------------|--------------|--------------------------------|--------------------------------|---------------------------------|----------------|
| 1   | 1-methyl-1-hydroxymethyladamantane               | 1383.95 | 1270    | 1200-78-8    | 67.26        | 0.19 $\pm$ 0.07 <sup>b</sup>   | 0.78 $\pm$ 0.11 <sup>a</sup>   | 1.00 $\pm$ 0.19 <sup>a</sup>    | 0.001          |
| 2   | 1,3-dimethyl-benzene                             | 868.48  | 907     | 108-38-3     | 75.78        | 0.47 $\pm$ 0.03                | 0.47 $\pm$ 0.02                | 0.49 $\pm$ 0.02                 | 0.810          |
| 3   | 1-ethyl-2,4-dimethyl-benzene                     | 1152.85 | 1119    | 874-41-9     | 68.32        | 0.11 $\pm$ 0.02 <sup>b</sup>   | 0.25 $\pm$ 0.01 <sup>a</sup>   | 0.22 $\pm$ 0.02 <sup>a</sup>    | 0.000          |
| 4   | 2,3,6-trimethyl-decane                           | 1305.47 | 1121    | 62238-12-4   | 83.28        | 0.24 $\pm$ 0.03                | 0.32 $\pm$ 0.02                | 0.24 $\pm$ 0.03                 | 0.065          |
| 5   | 3-ethyl-3-methyl-decane                          | 1260.55 | 1229    | 17312-66-2   | 90.8         | 0.91 $\pm$ 0.09                | 1.03 $\pm$ 0.10                | 0.85 $\pm$ 0.09                 | 0.421          |
| 6   | 6-ethyl-2-methyl-decane                          | 1410.1  | 1185    | 62108-21-8   | 80.3         | 0.39 $\pm$ 0.05 <sup>b</sup>   | 0.59 $\pm$ 0.03 <sup>a</sup>   | 0.46 $\pm$ 0.05 <sup>ab</sup>   | 0.012          |
| 7   | dodecane                                         | 1198.9  | 1214    | 112-40-3     | 90.55        | 1.50 $\pm$ 0.20                | 1.29 $\pm$ 0.13                | 1.12 $\pm$ 0.10                 | 0.221          |
| 8   | 4,6-dimethyl-dodecane                            | 1273.45 | 1285    | 61141-72-8   | 93.53        | 2.10 $\pm$ 0.21                | 2.46 $\pm$ 0.18                | 2.13 $\pm$ 0.21                 | 0.397          |
| 9   | 2-methyl-nonane                                  | 965.54  | 951     | 871-83-0     | 76.1         | 0.21 $\pm$ 0.01 <sup>a</sup>   | 0.17 $\pm$ 0.01 <sup>b</sup>   | 0.19 $\pm$ 0.01 <sup>ab</sup>   | 0.036          |
| 10  | 3,3-dimethyl-octane                              | 1021.18 | 931     | 4110-44-5    | 86.48        | 0.78 $\pm$ 0.04                | 0.66 $\pm$ 0.05                | 0.72 $\pm$ 0.03                 | 0.099          |
| 11  | tetradecane                                      | 1399.15 | 1413    | 629-59-4     | 96.78        | 0.86 $\pm$ 0.12 <sup>b</sup>   | 1.29 $\pm$ 0.08 <sup>a</sup>   | 1.08 $\pm$ 0.09 <sup>ab</sup>   | 0.017          |
| 12  | 2,8-dimethyl-undecane                            | 1220.17 | 1185    | 17301-25-6   | 89.03        | 0.47 $\pm$ 0.04                | 0.48 $\pm$ 0.05                | 0.40 $\pm$ 0.04                 | 0.362          |
| 13  | 3,3-dimethyl-undecane                            | 1419.97 | 1229    | 17312-65-1   | 77.21        | 0.11 $\pm$ 0.02 <sup>b</sup>   | 0.18 $\pm$ 0.01 <sup>a</sup>   | 0.13 $\pm$ 0.01 <sup>b</sup>    | 0.010          |
| 14  | 4,7-dimethyl-undecane                            | 1053.72 | 1185    | 17301-32-5   | 93.82        | 1.51 $\pm$ 0.09                | 1.35 $\pm$ 0.10                | 1.40 $\pm$ 0.06                 | 0.371          |
| 15  | 5,5-dimethyl-undecane                            | 1162.84 | 1229    | 17312-73-1   | 62.35        | 0.26 $\pm$ 0.02                | 0.23 $\pm$ 0.03                | 0.21 $\pm$ 0.02                 | 0.218          |
| 16  | 3-(acetyloxymethyl)-2,2,4-trimethyl-cyclohexanol | 1243.8  | 1530    | 1000162-14-5 | 76.03        | 94.30 $\pm$ 13.90 <sup>b</sup> | 178.64 $\pm$ 7.25 <sup>a</sup> | 181.89 $\pm$ 12.51 <sup>a</sup> | 0.000          |

|    |                                                |         |      |            |       |                           |                          |                           |       |
|----|------------------------------------------------|---------|------|------------|-------|---------------------------|--------------------------|---------------------------|-------|
| 17 | 3-nonenoic acid, methyl ester                  | 1098.65 | 1191 | 13481-87-3 | 77.16 | 133.51±18.54 <sup>b</sup> | 232.45±3.96 <sup>a</sup> | 239.79±11.39 <sup>a</sup> | 0.000 |
| 18 | butylated hydroxytoluene                       | 1502.28 | 1668 | 128-37-0   | 66.72 | 0.16±0.03 <sup>b</sup>    | 0.38±0.04 <sup>b</sup>   | 0.61±0.12 <sup>a</sup>    | 0.001 |
| 19 | phenol                                         | 985.99  | 901  | 108-95-2   | 81.61 | 44.97±1.59                | 49.53±2.51               | 45.88±1.09                | 0.196 |
| 20 | 4-ethyl-2-methyl-phenol                        | 1027.45 | 1227 | 2219-73-0  | 74.59 | 0.48±0.05 <sup>b</sup>    | 0.69±0.07 <sup>a</sup>   | 0.58±0.03 <sup>ab</sup>   | 0.035 |
| 21 | 4-(1,1-dimethylethyl)-benzene propanal         | 1363.25 | 1508 | 18127-01-0 | 74.56 | 0.29±0.09 <sup>b</sup>    | 0.88±0.13 <sup>a</sup>   | 0.88±0.13 <sup>a</sup>    | 0.002 |
| 22 | nonanal                                        | 1104.68 | 1104 | 124-19-6   | 85.19 | 2.16±0.21 <sup>b</sup>    | 3.05±0.15 <sup>a</sup>   | 2.21±0.26 <sup>b</sup>    | 0.010 |
| 23 | 1-(1-cyclohexen-1-yl)-1-propanone              | 1062.28 | 1126 | 1655-03-4  | 69.84 | 8.14±0.28 <sup>b</sup>    | 9.48±0.30 <sup>a</sup>   | 9.30±0.18 <sup>a</sup>    | 0.002 |
| 24 | 2,5-hexanedione                                | 988.47  | 890  | 110-13-4   | 76.05 | 2.52±0.08                 | 2.80±0.12                | 2.58±0.08                 | 0.103 |
| 25 | 4,4,5-trimethyl-2-cyclohexen-1-one             | 989.22  | 1069 | 17429-29-7 | 74.94 | 10.81±1.60 <sup>b</sup>   | 18.24±1.08 <sup>a</sup>  | 16.99±1.08 <sup>a</sup>   | 0.001 |
| 26 | 2-heptanone                                    | 892.58  | 853  | 110-43-0   | 83.15 | 0.57±0.08 <sup>b</sup>    | 1.09±0.17 <sup>a</sup>   | 0.63±0.08 <sup>b</sup>    | 0.009 |
| 27 | 2-nonanone                                     | 1091.76 | 1052 | 821-55-6   | 88.89 | 0.52±0.08 <sup>ab</sup>   | 0.65±0.09 <sup>a</sup>   | 0.32±0.03 <sup>b</sup>    | 0.011 |
| 28 | 5-methyl-5-(1-methylethyl)-3-heptyne-2,6-dione | 1017.17 | 1255 | 63922-44-1 | 69.65 | 0.33±0.05 <sup>b</sup>    | 0.55±0.03 <sup>a</sup>   | 0.51±0.03 <sup>a</sup>    | 0.000 |
| 29 | 4-amino-2(1h)-pyridinone                       | 1061.92 | 1080 | 38767-72-5 | 73.72 | 298.40±7.82 <sup>b</sup>  | 333.46±7.96 <sup>a</sup> | 330.65±4.53 <sup>a</sup>  | 0.002 |
| 30 | hydrazinecarboxylic acid, ethyl ester          | 772.84  | 928  | 4114-31-2  | 79.74 | 30.79±0.56 <sup>a</sup>   | 31.24±1.10 <sup>a</sup>  | 27.70±1.06 <sup>b</sup>   | 0.027 |
| 31 | methyl-5-hydroxymethyl-4-imidazolecarboxylate  | 1192.71 | 1436 | 82032-43-7 | 76.93 | 158.64±17.91 <sup>b</sup> | 248.09±5.69 <sup>a</sup> | 244.99±9.37 <sup>a</sup>  | 0.000 |
| 32 | methyl dl-alpha-aminobutyrate                  | 772.76  | 864  | 2483-62-7  | 63.42 | 2.67±0.04                 | 2.65±0.14                | 2.34±0.11                 | 0.059 |
| 33 | P-aminotoluene                                 | 1155.63 | 1105 | 106-49-0   | 63.91 | 0.11±0.02 <sup>c</sup>    | 0.23±0.01 <sup>b</sup>   | 0.29±0.02 <sup>a</sup>    | 0.000 |

|    |                                              |         |      |              |       |                           |                           |                           |       |
|----|----------------------------------------------|---------|------|--------------|-------|---------------------------|---------------------------|---------------------------|-------|
| 34 | 4-methylmercaptoaniline                      | 1126.71 | 1356 | 104-96-1     | 61.87 | 0.30±0.05 <sup>b</sup>    | 0.55±0.04 <sup>a</sup>    | 0.50±0.04 <sup>a</sup>    | 0.001 |
| 35 | dimethyl-sulfur diimide                      | 1396.5  | -    | 13849-02-0   | 60.0  | 0.08±0.02 <sup>b</sup>    | 0.22±0.03 <sup>a</sup>    | 0.34±0.07 <sup>a</sup>    | 0.001 |
| 36 | octahydro-3-methyl-1h-indole                 | 1028.83 | 1188 | 37865-94-4   | 81.48 | 2.22±0.32 <sup>b</sup>    | 3.73±0.24 <sup>a</sup>    | 3.51±0.18 <sup>a</sup>    | 0.001 |
| 37 | 1-(2-furanyl)-1-propanone                    | 1034.44 | 977  | 3194-15-8    | 64.7  | 1.17±0.19 <sup>b</sup>    | 2.22±0.13 <sup>a</sup>    | 2.08±0.12 <sup>a</sup>    | 0.000 |
| 38 | N-(1,1-dimethylethyl)-2-benzoxazoline        | 1297.23 | 1557 | 28291-84-1   | 75.27 | 0.49±0.17 <sup>b</sup>    | 1.56±0.22 <sup>a</sup>    | 1.79±0.29 <sup>a</sup>    | 0.001 |
| 39 | 4,6-dimethyl-isothiazolo[5,4-b]pyridin-3-one | 1478.68 | 1571 | 60750-75-6   | 78.78 | 128.47±32.09 <sup>b</sup> | 341.38±19.97 <sup>a</sup> | 379.18±40.94 <sup>a</sup> | 0.000 |
| 40 | 6-methyl-7-oxa-8-azabicyclo[4.2.1]non-8-ene  | 1044.6  | 1092 | 1000362-10-7 | 75.94 | 3.07±0.45 <sup>b</sup>    | 5.01±0.30 <sup>a</sup>    | 4.64±0.28 <sup>a</sup>    | 0.002 |
| 41 | 2-methoxy-5-methyl-thiophene                 | 1084.39 | 960  | 31053-55-1   | 82.43 | 62.81±1.34                | 69.53±3.54                | 66.01±1.73                | 0.163 |
| 42 | diethyl(decyloxy)-borane                     | 1239.23 | -    | 1000152-34-3 | 89.13 | 0.22±0.02                 | 0.26±0.03                 | 0.23±0.02                 | 0.414 |
| 43 | 1-iodo-dodecane                              | 1486.44 | 1628 | 4292-19-7    | 89.16 | 1.02±0.15 <sup>b</sup>    | 1.72±0.13 <sup>a</sup>    | 1.50±0.14 <sup>a</sup>    | 0.006 |
| 44 | bromo-methane                                | 1034.71 | -    | 74-83-9      | 78.45 | 2.36±0.39 <sup>b</sup>    | 4.42±0.25 <sup>a</sup>    | 4.11±0.22 <sup>a</sup>    | 0.000 |
| 45 | iodo-methane                                 | 1145.49 | -    | 74-88-4      | 67.27 | 0.44±0.03 <sup>b</sup>    | 0.59±0.03 <sup>a</sup>    | 0.56±0.03 <sup>a</sup>    | 0.002 |

Abbreviations: RI, retention index calculated using N-alkanes; NIST\_RI: Retention index of a compound on a non-polar column; CAS, chemical abstracts service;

G1, corn straw; G2, wheat shell; G3, wheat straw. The mass spectrometry fingerprints of the samples were mirrored and matched with the reference fingerprints, with

high accuracy for substances with match factor > 70 and qualitative results for substances with match factor < 70.
